# Supplementary material
Source: MDPI journal article supplement (https://www.mdpi.com/2075-163X/11/5/484)
Supplement: s1 [file s1]

# Efficient Extraction, Recovery, and Upgrading of Rare Earth Elements from Coal-Based Resources: Bioleaching and Precipitation

Zongliang Zhang, Landon Allen, Prasenjit Podder, Michael L. Free, and Prashant K. Sarswat \*

**Table S1.** Comparison of Visual Minteq species calculations for leaching solutions with added magnesium carbonate for iron removal.

| Species                                         | Concentration          | Activity               | Log Activity | Fraction |
|-------------------------------------------------|------------------------|------------------------|--------------|----------|
| Dy(CO <sub>3</sub> ) <sub>2</sub> <sup>−</sup>  | $2.48 \times 10^{-26}$ | $1.83 \times 10^{-26}$ | −25.74       | 0.00%    |
| Dy(SO <sub>4</sub> ) <sub>2</sub> <sup>−</sup>  | $7.11 \times 10^{-06}$ | $5.25 \times 10^{-06}$ | −5.28        | 2.85%    |
| Dy <sup>+3</sup>                                | $1.09 \times 10^{-04}$ | $7.06 \times 10^{-06}$ | −5.15        | 43.65%   |
| DyCO <sub>3</sub> <sup>+</sup>                  | $6.20 \times 10^{-15}$ | $4.57 \times 10^{-15}$ | −14.34       | 0.00%    |
| DyHCO <sub>3</sub> <sup>+2</sup>                | $1.01 \times 10^{-11}$ | $2.99 \times 10^{-12}$ | −11.52       | 0.00%    |
| DyOH <sup>+2</sup>                              | $1.74 \times 10^{-10}$ | $5.14 \times 10^{-11}$ | −10.29       | 0.00%    |
| DySO <sub>4</sub> <sup>+</sup>                  | $1.34 \times 10^{-04}$ | $9.87 \times 10^{-05}$ | −4.01        | 53.51%   |
| Eu(CO <sub>3</sub> ) <sub>2</sub> <sup>−</sup>  | $1.12 \times 10^{-26}$ | $8.23 \times 10^{-27}$ | −26.08       | 0.00%    |
| Eu(SO <sub>4</sub> ) <sub>2</sub> <sup>−</sup>  | $2.43 \times 10^{-05}$ | $1.79 \times 10^{-05}$ | −4.75        | 9.73%    |
| Eu <sup>+3</sup>                                | $9.37 \times 10^{-05}$ | $6.06 \times 10^{-06}$ | −5.22        | 37.49%   |
| EuCO <sub>3</sub> <sup>+</sup>                  | $4.43 \times 10^{-15}$ | $3.27 \times 10^{-15}$ | −14.49       | 0.00%    |
| EuHCO <sub>3</sub> <sup>+2</sup>                | $8.11 \times 10^{-12}$ | $2.40 \times 10^{-12}$ | −11.62       | 0.00%    |
| EuOH <sup>+2</sup>                              | $1.01 \times 10^{-10}$ | $2.98 \times 10^{-11}$ | −10.53       | 0.00%    |
| EuSO <sub>4</sub> <sup>+</sup>                  | $1.32 \times 10^{-04}$ | $9.73 \times 10^{-05}$ | −4.01        | 52.78%   |
| Fe(OH) <sub>2</sub> <sup>+</sup>                | $6.04 \times 10^{-05}$ | $4.46 \times 10^{-05}$ | −4.35        | 0.17%    |
| Fe(OH) <sub>3</sub> (aq)                        | $6.70 \times 10^{-12}$ | $7.10 \times 10^{-12}$ | −11.15       | 0.00%    |
| Fe(OH) <sub>4</sub> <sup>−</sup>                | $5.44 \times 10^{-17}$ | $4.01 \times 10^{-17}$ | −16.40       | 0.00%    |
| Fe(SO <sub>4</sub> ) <sub>2</sub> <sup>−</sup>  | $1.20 \times 10^{-03}$ | $8.83 \times 10^{-04}$ | −3.05        | 3.30%    |
| Fe <sup>+3</sup>                                | $4.83 \times 10^{-03}$ | $3.12 \times 10^{-04}$ | −3.51        | 13.31%   |
| Fe <sub>2</sub> (OH) <sub>2</sub> <sup>+4</sup> | $1.30 \times 10^{-03}$ | $9.99 \times 10^{-06}$ | −5.00        | 3.58%    |
| Fe <sub>3</sub> (OH) <sub>4</sub> <sup>+5</sup> | $2.03 \times 10^{-04}$ | $1.01 \times 10^{-07}$ | −7.00        | 0.56%    |
| FeOH <sup>+2</sup>                              | $2.85 \times 10^{-03}$ | $8.45 \times 10^{-04}$ | −3.07        | 7.86%    |
| FeSO <sub>4</sub> <sup>+</sup>                  | $2.58 \times 10^{-02}$ | $1.91 \times 10^{-02}$ | −1.72        | 71.22%   |
| Mg <sup>+2</sup>                                | $8.51 \times 10^{-02}$ | $2.52 \times 10^{-02}$ | −1.60        | 85.14%   |
| Mg <sub>2</sub> CO <sub>3</sub> <sup>+2</sup>   | $1.49 \times 10^{-16}$ | $4.41 \times 10^{-17}$ | −16.36       | 0.00%    |
| MgCO <sub>3</sub> (aq)                          | $3.53 \times 10^{-16}$ | $3.74 \times 10^{-16}$ | −15.43       | 0.00%    |
| MgHCO <sub>3</sub> <sup>+</sup>                 | $4.69 \times 10^{-10}$ | $3.46 \times 10^{-10}$ | −9.46        | 0.00%    |
| MgOH <sup>+</sup>                               | $3.71 \times 10^{-11}$ | $2.73 \times 10^{-11}$ | −10.56       | 0.00%    |
| MgSO <sub>4</sub> (aq)                          | $1.49 \times 10^{-02}$ | $1.57 \times 10^{-02}$ | −1.80        | 14.86%   |
| Sc(OH) <sub>2</sub> <sup>+</sup>                | $5.96 \times 10^{-11}$ | $4.40 \times 10^{-11}$ | −10.36       | 0.00%    |
| Sc(OH) <sub>3</sub> (aq)                        | $4.71 \times 10^{-17}$ | $4.99 \times 10^{-17}$ | −16.30       | 0.00%    |
| Sc(OH) <sub>4</sub> <sup>−</sup>                | $2.43 \times 10^{-22}$ | $1.79 \times 10^{-22}$ | −21.75       | 0.00%    |
| Sc(SO <sub>4</sub> ) <sub>2</sub> <sup>−</sup>  | $1.72 \times 10^{-05}$ | $1.27 \times 10^{-05}$ | −4.90        | 6.89%    |
| Sc <sup>+3</sup>                                | $4.19 \times 10^{-05}$ | $2.71 \times 10^{-06}$ | −5.57        | 16.75%   |
| Sc <sub>2</sub> (OH) <sub>2</sub> <sup>+4</sup> | $7.77 \times 10^{-11}$ | $5.97 \times 10^{-13}$ | −12.22       | 0.00%    |
| ScOH <sup>+2</sup>                              | $1.31 \times 10^{-07}$ | $3.87 \times 10^{-08}$ | −7.41        | 0.05%    |
| ScSO <sub>4</sub> <sup>+</sup>                  | $1.91 \times 10^{-04}$ | $1.41 \times 10^{-04}$ | −3.85        | 76.30%   |
| Y(CO <sub>3</sub> ) <sub>2</sub> <sup>−</sup>   | $1.44 \times 10^{-26}$ | $1.06 \times 10^{-26}$ | −25.98       | 0.00%    |
| Y(SO <sub>4</sub> ) <sub>2</sub> <sup>−</sup>   | $1.98 \times 10^{-05}$ | $1.46 \times 10^{-05}$ | −4.84        | 7.90%    |
| Y <sup>+3</sup>                                 | $1.21 \times 10^{-04}$ | $7.80 \times 10^{-06}$ | −5.11        | 48.25%   |
| Y <sub>2</sub> (OH) <sub>2</sub> <sup>+4</sup>  | $4.06 \times 10^{-18}$ | $3.12 \times 10^{-20}$ | −19.51       | 0.00%    |
| YCO <sub>3</sub> <sup>+</sup>                   | $5.70 \times 10^{-15}$ | $4.20 \times 10^{-15}$ | −14.38       | 0.00%    |
| YHCO <sub>3</sub> <sup>+2</sup>                 | $7.39 \times 10^{-12}$ | $2.19 \times 10^{-12}$ | −11.66       | 0.00%    |
| YOH <sup>+2</sup>                               | $1.18 \times 10^{-10}$ | $3.50 \times 10^{-11}$ | −10.46       | 0.00%    |
| YSO <sub>4</sub> <sup>+</sup>                   | $1.10 \times 10^{-04}$ | $8.09 \times 10^{-05}$ | −4.09        | 43.85%   |
